# Supplementary material for: Source contributions and potential reductions to health effects of particulate matter in India
Source: Copernicus journal article supplement (doi:10.5194/acp-18-15219-2018), 2018-10-23
Supplement: Supplementary file 1 [file acp-18-15219-2018-supplement.pdf]

Supplement of Atmos. Chem. Phys., 18, 15219–15229, 2018  
<https://doi.org/10.5194/acp-18-15219-2018-supplement>  
© Author(s) 2018. This work is distributed under  
the Creative Commons Attribution 4.0 License.

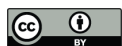

*Supplement of*

## **Source contributions and potential reductions to health effects of particulate matter in India**

**Hao Guo et al.**

*Correspondence to:* Hongliang Zhang (hlzhang@lsu.edu)

The copyright of individual parts of the supplement might differ from the CC BY 4.0 License.

Table S1. Baseline mortality (y0,  $\times 10^5$ ) for chronic obstructive pulmonary disease (COPD), lung cancer (LC), ischemic heart disease (IHD) and cerebrovascular disease (CEV) for different age groups in India based on the WHO Mortality Database (for year 2010).

| Age   | COPD   |        | LC     |        | IHD    |        | CEV    |        |
|-------|--------|--------|--------|--------|--------|--------|--------|--------|
|       | Male   | Female | Male   | Female | Male   | Female | Male   | Female |
| 15-24 | 2.41   | 1.58   | 0.68   | 0.49   | 2.58   | 0.84   | 3.11   | 1.29   |
| 25-34 | 5.30   | 3.71   | 2.57   | 1.45   | 7.88   | 2.55   | 6.51   | 2.92   |
| 35-44 | 10.11  | 3.99   | 8.03   | 3.68   | 17.02  | 5.95   | 12.32  | 5.62   |
| 45-54 | 20.08  | 9.49   | 16.39  | 4.45   | 25.44  | 11.66  | 18.96  | 9.49   |
| 55-64 | 118.30 | 62.59  | 78.96  | 21.49  | 131.31 | 78.77  | 87.80  | 54.38  |
| 65-69 | 397.55 | 259.99 | 124.53 | 44.74  | 373.88 | 326.72 | 231.75 | 170.67 |
| 70+   | 397.55 | 259.99 | 124.53 | 44.74  | 373.88 | 326.72 | 231.75 | 170.67 |

Table S2. Population age distribution for India, 2015.

| Age group | Male   | Female |
|-----------|--------|--------|
| 15-24     | 20.60% | 20.60% |
| 25-34     | 17.50% | 17.70% |
| 35-44     | 13.00% | 13.10% |
| 45-54     | 9.60%  | 9.50%  |
| 55-64     | 6.41%  | 6.90%  |
| 65-69     | 2.10%  | 2.20%  |
| 70+       | 3.00%  | 3.50%  |

Data source: United Nations, Department of Economic and Social Affairs, Population Division 58 (2015). World Population Prospects: The 2015 Revision, custom data acquired via website.

Table S3. Source contributions of each source types to premature mortality due to COPD, LC, IHD and Stroke due to long term exposure of ambient PM<sub>2.5</sub> based on predicted 2015 annual average concentrations.

| State                | Energy | Industry | Residential | On-road | Off-road | Agriculture | Open-burning | Dust   |
|----------------------|--------|----------|-------------|---------|----------|-------------|--------------|--------|
| Andhra Pradesh       | 13.50% | 18.75%   | 48.50%      | 1.25%   | 1.25%    | 9.75%       | 0.25%        | 6.75%  |
| Arunachal Pradesh    | 0%     | 0%       | 50%         | 0%      | 0%       | 50%         | 0%           | 0%     |
| Assam                | 1.88%  | 6.88%    | 61.25%      | 0.63%   | 1.25%    | 24.37%      | 2.50%        | 1.25%  |
| Bihar                | 2.32%  | 18.70%   | 62.01%      | 0.66%   | 0.66%    | 13.96%      | 0.08%        | 1.24%  |
| Chandigarh           | 0%     | 0%       | 100%        | 0%      | 0%       | 0%          | 0%           | 0%     |
| Chhattisgarh         | 22.625 | 13.13%   | 40.87%      | 0.73%   | 0.73%    | 0.73%       | 16.78%       | 5.10%  |
| Dadra & Nagar Haveli | 0%     | 0%       | 100%        | 0%      | 0%       | 0%          | 0%           | 0%     |
| Daman & Diu          | 0%     | 0%       | 100%        | 0%      | 0%       | 0%          | 0%           | 0%     |
| Goa                  | 14.28% | 14.28%   | 57.14%      | 0%      | 0%       | 14.28%      | 0%           | 0%     |
| Gujrat               | 10.23% | 17.40%   | 53.24%      | 1.70%   | 1.02%    | 5.11%       | 0%           | 11.26% |
| Haryana              | 6.42%  | 25.71%   | 52.14%      | 1.42%   | 0.71%    | 9.28%       | 0.24%        | 4.28%  |
| Himachal Pradesh     | 9.67%  | 12.90%   | 54.83%      | 3.22%   | 0%       | 12.90%      | 0%           | 6.45%  |
| Jammu & Kashmir      | 0%     | 9.09%    | 68.18%      | 0%      | 0%       | 13.63%      | 0%           | 9.09%  |
| Jharkhand            | 10.06% | 26.29%   | 48.05%      | 0.65%   | 0.97%    | 12.01%      | 0.32%        | 2.27%  |
| Karnataka            | 9.40%  | 14.35%   | 54.95%      | 3.46%   | 1.48%    | 8.91%       | 0.49%        | 6.93%  |
| Kerala               | 3.41%  | 26.13%   | 62.50%      | 1.70%   | 1.13%    | 3.40%       | 0%           | 0.56%  |
| Lakshadweep          | 0%     | 0%       | 0%          | 0%      | 0%       | 0%          | 0%           | 0%     |
| Madhya Pradesh       | 10.85% | 10.59%   | 55.29%      | 1.03%   | 1.03%    | 12.14%      | 0.26%        | 9.04%  |
| Maharashtra          | 11.44% | 23.87%   | 49.01%      | 1.13%   | 0.98%    | 7.76%       | 0.14%        | 5.64%  |
| Manipur              | 0%     | 12.50%   | 50%         | 0%      | 0%       | 12.50%      | 12.50%       | 0%     |
| Meghalaya            | 5.55%  | 11.11%   | 55.55%      | 0%      | 0%       | 22.22%      | 0%           | 0%     |
| Mizoram              | 0%     | 0%       | 50%         | 0%      | 0%       | 25%         | 0%           | 0%     |
| Nagaland             | 0%     | 12.50%   | 62.50%      | 0%      | 0%       | 12.50%      | 12.50%       | 0%     |
| Delhi                | 5.83%  | 40%      | 45.83%      | 0.83%   | 0.83%    | 4.16%       | 0%           | 2.50%  |
| Odisha               | 17.39% | 14.62%   | 45.45%      | 0.79%   | 0.79%    | 17%         | 0.39%        | 3.95%  |
| Puducherry           | 12.50% | 25%      | 50%         | 0%      | 0%       | 12.50%      | 0%           | 0%     |
| Punjab               | 3.75%  | 14.28%   | 57.51%      | 1.50%   | 0.75%    | 17.67%      | 0.38%        | 4.51%  |
| Rajasthan            | 4.88%  | 9.19%    | 57.47%      | 2.01%   | 1.14%    | 7.75%       | 0.28%        | 17.24% |
| Sikkim               | 7.40%  | 38.88%   | 46.29%      | 1.85%   | 0%       | 3.70%       | 0%           | 1.85%  |
| Tamil Nadu           | 15.11% | 19.55%   | 52.88%      | 1.77%   | 0.88%    | 7.55%       | 0%           | 1.77%  |
| Tripura              | 5.26%  | 5.26%    | 63.15%      | 0%      | 0%       | 21.05%      | 0%           | 0%     |
| Uttar Pradesh        | 4.03%  | 18.75%   | 61%         | 0.83%   | 0.83%    | 12%         | 0.08%        | 2.45%  |
| Uttarakhand          | 2.63%  | 10.52%   | 65.78%      | 2.63%   | 2.63%    | 13.15%      | 0%           | 5.26%  |
| West Bengal          | 5.21%  | 26.68%   | 49.54%      | 0.60%   | 0.70%    | 15.84%      | 0.10%        | 1.30%  |
| India                | 6.80%  | 19.66%   | 55.45%      | 1.05%   | 0.85%    | 11.90%      | 0.23%        | 4.02%  |

Table S4. Premature mortality reduction in percentage attributable to PM<sub>2.5</sub> exposure in 2015 and premature mortality when PM<sub>2.5</sub> reduced to 40µg/m<sup>3</sup>, 15 µg/m<sup>3</sup>, 12µg/m<sup>3</sup> and 10/µg m<sup>3</sup> (WHO guideline level) at highly polluted states (Annual average concentration ≥ 40 µg/m<sup>3</sup>).

| States         | 40 µg/m <sup>3</sup> | 15 µg/m <sup>3</sup> | 12 µg/m <sup>3</sup> | 10 µg/m <sup>3</sup> |
|----------------|----------------------|----------------------|----------------------|----------------------|
| Assam          | 3.51%                | 37.54%               | 53.68%               | 67.02%               |
| Bihar          | 18.77%               | 61.58%               | 71.73%               | 79.88%               |
| Chhattisgarh   | 3.97%                | 40.79%               | 56.68%               | 68.95%               |
| Haryana        | 14.71%               | 59.00%               | 69.72%               | 78.55%               |
| Jharkhand      | 7.17%                | 55.23%               | 67.05%               | 76.55%               |
| Madhya Pradesh | 1.46%                | 34.31%               | 51.60%               | 65.56%               |
| Maharashtra    | 5.29%                | 42.22%               | 57.47%               | 69.75%               |
| Delhi          | 25.68%               | 64.86%               | 74.32%               | 81.76%               |
| Odisha         | 2.90%                | 46.91%               | 60.81%               | 72.20%               |
| Punjab         | 5.18%                | 52.59%               | 65.03%               | 75.13%               |
| Rajasthan      | 2.07%                | 29.19%               | 46.73%               | 62.20%               |
| Uttar Pradesh  | 15.12%               | 59.34%               | 70.03%               | 78.68%               |
| West Bengal    | 19.70%               | 61.36%               | 71.49%               | 79.68%               |

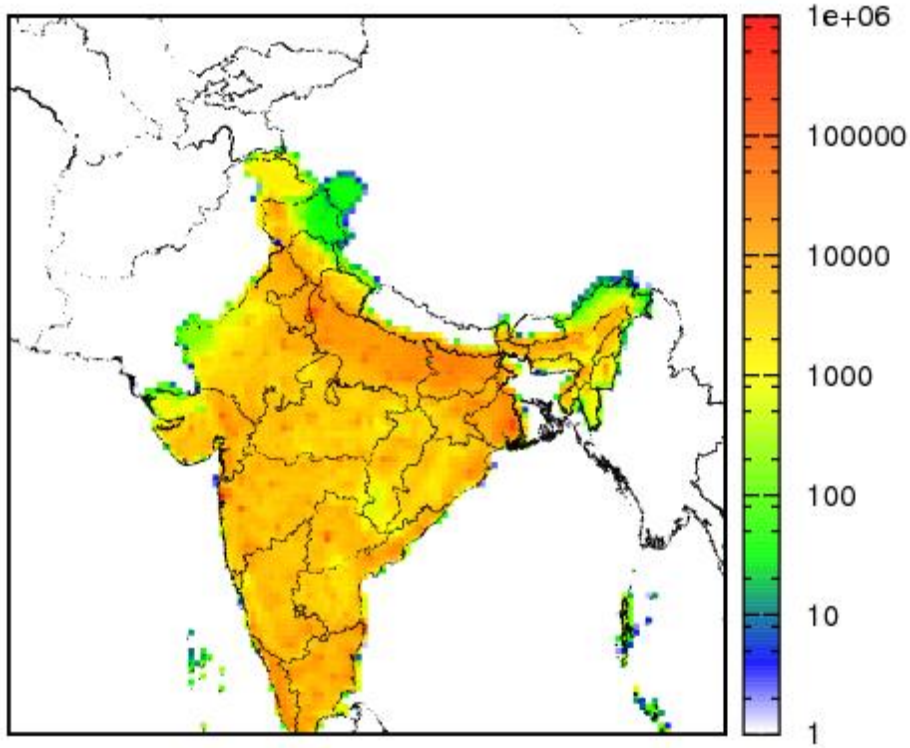

Figure S1. Design of  $36 \times 36 \text{ km}^2$  India domain with colorbar represent population density in each grid.

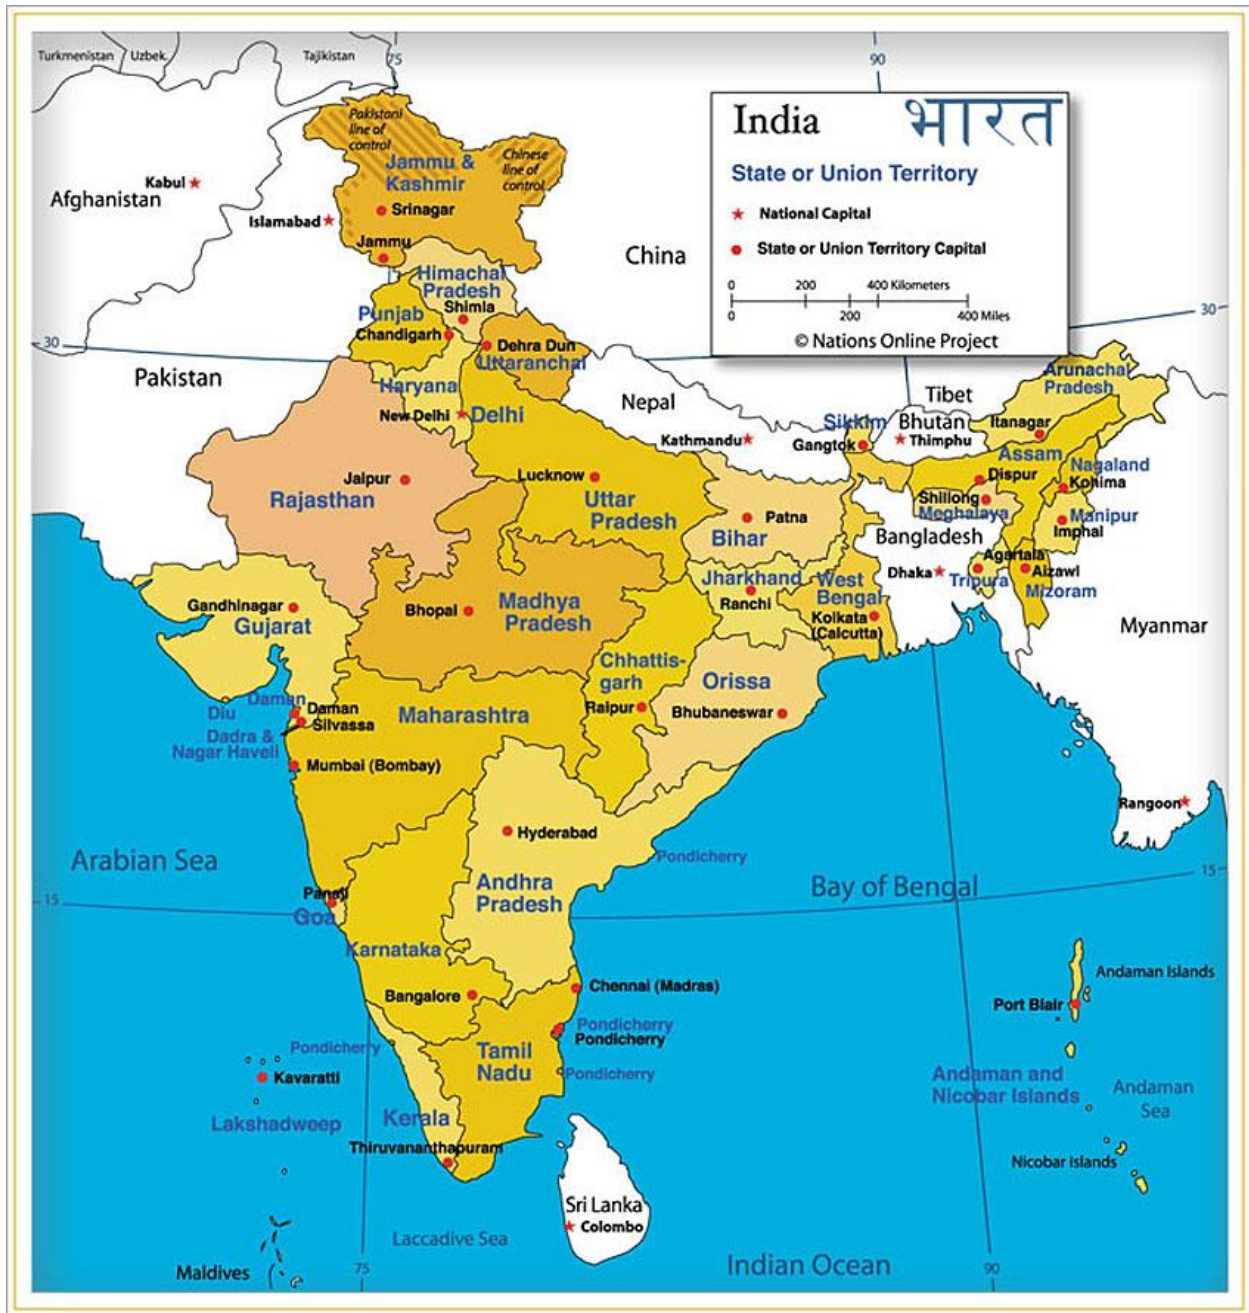

Figure S2. Map of India ([https://www.nationsonline.org/oneworld/india\\_map.html](https://www.nationsonline.org/oneworld/india_map.html)).

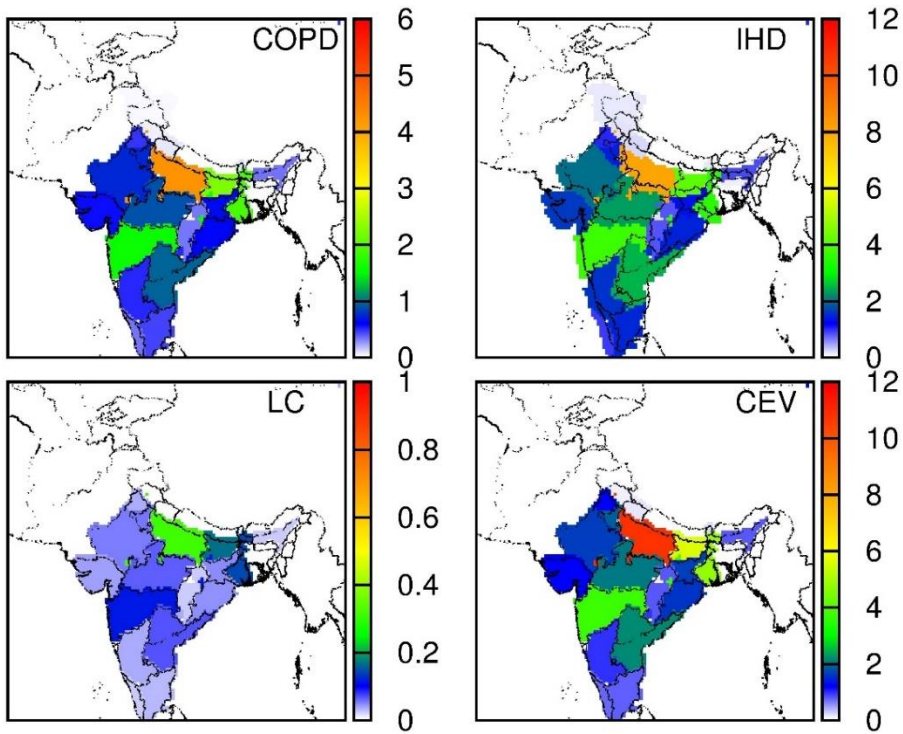

Figure S3. State-level disease specific mortality ( $\times 10^4$  deaths) in 2015 due to COPD, LC, IHD and CEV.



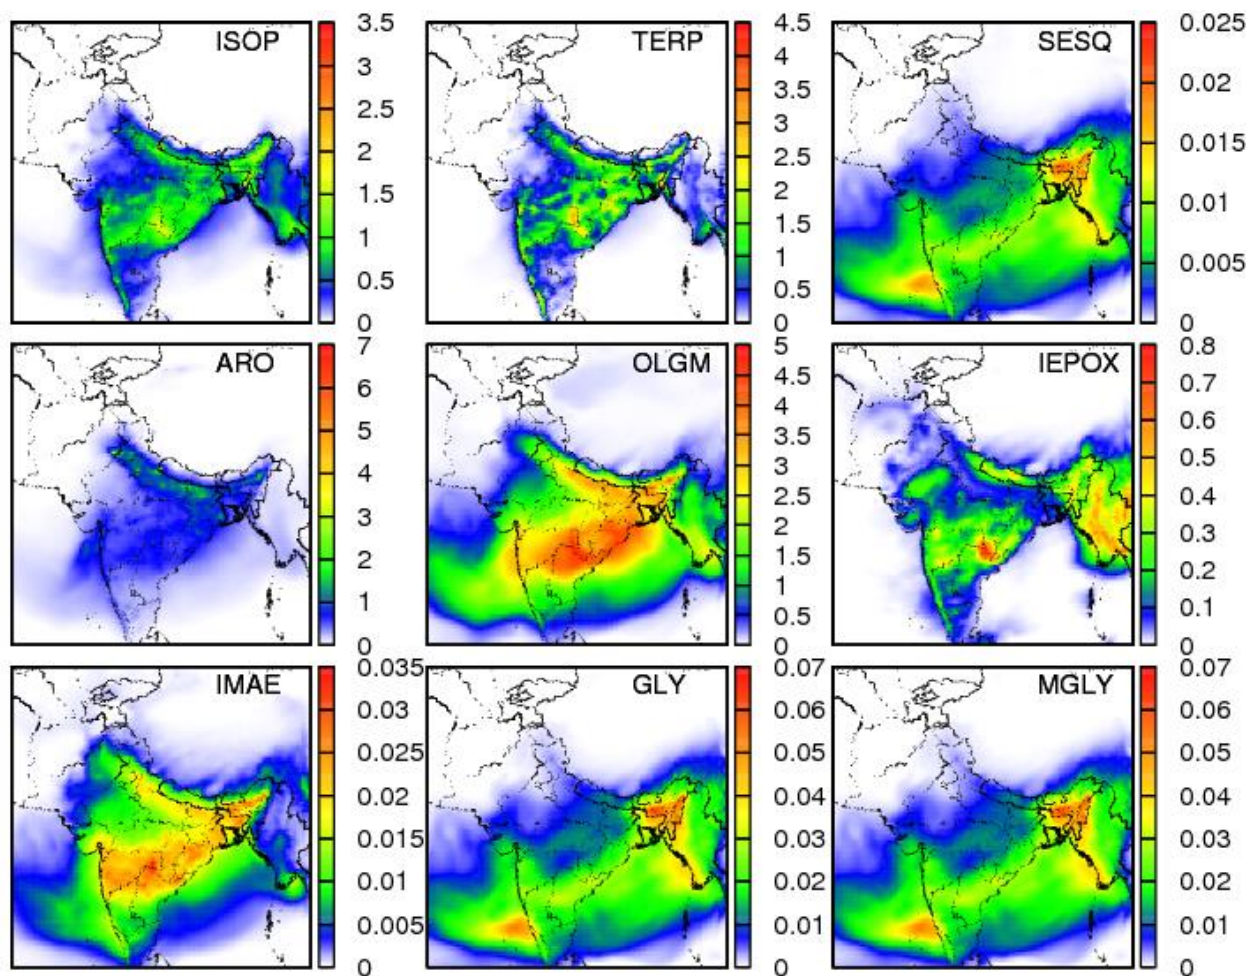

Figure S4. Predict spatial distribution of different SOA products in summer episode: Isoprene (ISOP), monoterpenes (TERP), sesquiterpenes (SESQ), aromatics, oligomers (OLGM), isoprene epoxydiol (IEPOX), isoprene methacrylic acid epoxide (IMAE), glyoxal (GLY) and methylglyoxal (MGLY). Units are all in  $\mu\text{g}/\text{m}^3$ .
